# Supplementary material for: Photocatalytic reduction of o-chloronitrobenzene under visible light irradiation over CdS quantum dot sensitized TiO2
Source: Royal Society of Chemistry journal article supplement (doi:10.1039/c4cp01250j), 2014-01-01
Supplement: c4cp01250j1.pdf [file c4cp01250j1.pdf]

Supporting information

Thermogravimetric analysis (TGA) was carried out using a Mettler Toledo TGA-SDTA851 analyzer (Switzerland) from room temperature to 800 °C in the air atmosphere at a heating rate of 10 °C/min.

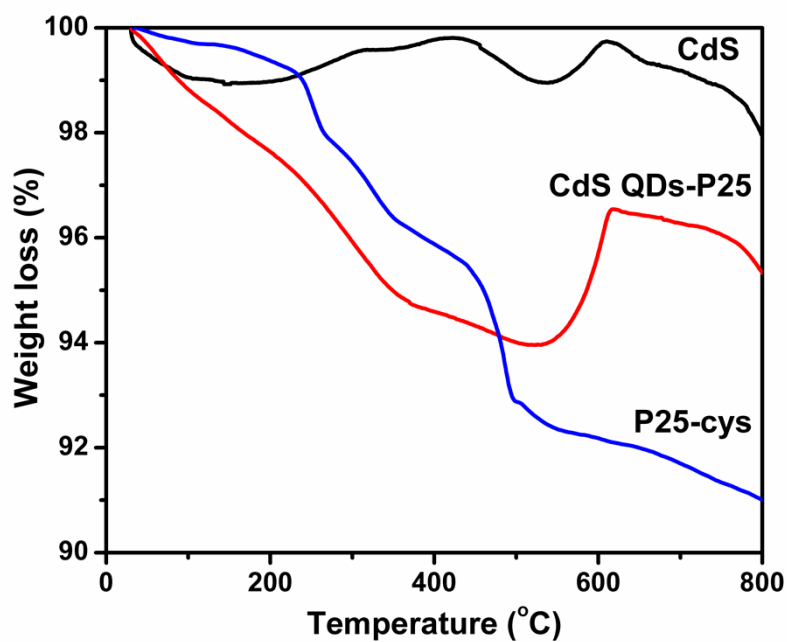

Fig. S1 TGA curves of CdS, CdS QDs-P25 and P25-cys
